# Supplementary material for: Depigmenting potential of lichen extracts evaluated by in vitro and in vivo tests
Source: PeerJ. 2020 May 15;8:e9150. doi: 10.7717/peerj.9150 (PMC7233272; doi:10.7717/peerj.9150)
Supplement: Supplemental Information 2 [file peerj-08-9150-s002.xls]

## Sheet: 60 minuti
ID	Species	Solvent	Time (min)	Conc (µg/mL)	% inibition
1	Cetraria islandica	Methanol	60	10	1.99376
2	Cetraria islandica	Methanol	60	10	1.99376
3	Cetraria islandica	Methanol	60	10	-4.58282
4	Cetraria islandica	Methanol	60	10	-2.48512
5	Cetraria islandica	Methanol	60	10	-3.33554
6	Cetraria islandica	Methanol	60	10	0.74648
7	Cetraria islandica	Chloroform	60	10	-2.39672
8	Cetraria islandica	Chloroform	60	10	4.6673
9	Cetraria islandica	Chloroform	60	10	4.98266
10	Cetraria islandica	Chloroform	60	10	12.4251
11	Cetraria islandica	Chloroform	60	10	39.7982
12	Cetraria islandica	Chloroform	60	10	-42.7625
13	Cetraria islandica	Water	60	10	-14.4154
14	Cetraria islandica	Water	60	10	-8.14011
15	Cetraria islandica	Water	60	10	37.5037
16	Cetraria islandica	Water	60	10	12.8762
17	Cetraria islandica	Water	60	10	-3.46325
18	Cetraria islandica	Water	60	10	0.325604
19	Cetraria islandica	Methanol	60	50	43.8156
20	Cetraria islandica	Methanol	60	50	42.1714
21	Cetraria islandica	Methanol	60	50	39.3367
22	Cetraria islandica	Methanol	60	50	33.4971
23	Cetraria islandica	Methanol	60	50	15.1847
24	Cetraria islandica	Methanol	60	50	10.1956
25	Cetraria islandica	Chloroform	60	50	-17.2711
26	Cetraria islandica	Chloroform	60	50	-26.1642
27	Cetraria islandica	Chloroform	60	50	-17.145
28	Cetraria islandica	Chloroform	60	50	19.1212
29	Cetraria islandica	Chloroform	60	50	-1.06171
30	Cetraria islandica	Chloroform	60	50	-20.1724
31	Cetraria islandica	Water	60	50	-11.4159
32	Cetraria islandica	Water	60	50	4.21312
33	Cetraria islandica	Water	60	50	-12.1263
34	Cetraria islandica	Water	60	50	-4.19339
35	Cetraria islandica	Water	60	50	15.2245
36	Cetraria islandica	Water	60	50	-0.759743
37	Cetraria islandica	Methanol	60	100	32.6089
38	Cetraria islandica	Methanol	60	100	30.9081
39	Cetraria islandica	Methanol	60	100	25.0685
40	Cetraria islandica	Methanol	60	100	25.5788
41	Cetraria islandica	Methanol	60	100	22.6306
42	Cetraria islandica	Methanol	60	100	22.5739
43	Cetraria islandica	Chloroform	60	100	-20.3826
44	Cetraria islandica	Chloroform	60	100	-20.8872
45	Cetraria islandica	Chloroform	60	100	22.0645
46	Cetraria islandica	Chloroform	60	100	-23.2209
47	Cetraria islandica	Chloroform	60	100	-28.7081
48	Cetraria islandica	Chloroform	60	100	-24.2931
49	Cetraria islandica	Water	60	100	-7.55797
50	Cetraria islandica	Water	60	100	6.59102
51	Cetraria islandica	Water	60	100	0.670942
52	Cetraria islandica	Water	60	100	16.3
53	Cetraria islandica	Water	60	100	8.36704
54	Cetraria islandica	Water	60	100	12.6887
55	Cetraria islandica	Methanol	60	250	40.5548
56	Cetraria islandica	Methanol	60	250	34.7147
57	Cetraria islandica	Methanol	60	250	26.4918
58	Cetraria islandica	Methanol	60	250	31.8341
59	Cetraria islandica	Methanol	60	250	28.6025
60	Cetraria islandica	Methanol	60	250	40.7918
61	Cetraria islandica	Chloroform	60	250	-14.4644
62	Cetraria islandica	Chloroform	60	250	-19.8886
63	Cetraria islandica	Chloroform	60	250	-12.0677
64	Cetraria islandica	Chloroform	60	250	-19.2579
65	Cetraria islandica	Chloroform	60	250	-15.9151
66	Cetraria islandica	Chloroform	60	250	5.21392
67	Cetraria islandica	Water	60	250	7.86384
68	Cetraria islandica	Water	60	250	12.6591
69	Cetraria islandica	Water	60	250	16.6256
70	Cetraria islandica	Water	60	250	13.4287
71	Cetraria islandica	Water	60	250	11.4751
72	Cetraria islandica	Water	60	250	13.6655
73	Cetraria islandica	Methanol	60	350	36.8799
74	Cetraria islandica	Methanol	60	350	38.6374
75	Cetraria islandica	Methanol	60	350	33.705
76	Cetraria islandica	Methanol	60	350	36.483
77	Cetraria islandica	Methanol	60	350	31.8341
78	Cetraria islandica	Methanol	60	350	32.9113
79	Cetraria islandica	Chloroform	60	350	-23.1473
80	Cetraria islandica	Chloroform	60	350	-16.0202
81	Cetraria islandica	Chloroform	60	350	17.4708
82	Cetraria islandica	Chloroform	60	350	-25.1025
83	Cetraria islandica	Chloroform	60	350	-25.4178
84	Cetraria islandica	Chloroform	60	350	-21.6966
85	Cetraria islandica	Water	60	350	9.8964
86	Cetraria islandica	Water	60	350	22.9206
87	Cetraria islandica	Water	60	350	16.8821
88	Cetraria islandica	Water	60	350	34.5831
89	Cetraria islandica	Water	60	350	7.64677
90	Cetraria islandica	Water	60	350	-4.667
91	Cetraria islandica	Methanol	60	500	48.5968
92	Cetraria islandica	Methanol	60	500	44.4014
93	Cetraria islandica	Methanol	60	500	40.0926
94	Cetraria islandica	Methanol	60	500	42.0769
95	Cetraria islandica	Methanol	60	500	37.8815
96	Cetraria islandica	Methanol	60	500	42.7573
97	Cetraria islandica	Chloroform	60	500	25.6386
98	Cetraria islandica	Chloroform	60	500	24.6925
99	Cetraria islandica	Chloroform	60	500	50.9934
100	Cetraria islandica	Chloroform	60	500	45.6954
101	Cetraria islandica	Chloroform	60	500	13.9704
102	Cetraria islandica	Chloroform	60	500	20.4667
103	Cetraria islandica	Water	60	500	-21.411
104	Cetraria islandica	Water	60	500	-1.34188
105	Cetraria islandica	Water	60	500	6.88703
106	Cetraria islandica	Water	60	500	10.2615
107	Cetraria islandica	Water	60	500	1.67736
108	Cetraria islandica	Water	60	500	-2.3483
109	Flavoparmelia caperata	Methanol	60	10	5.69048
110	Flavoparmelia caperata	Methanol	60	10	-5.02381
111	Flavoparmelia caperata	Methanol	60	10	-12.4524
112	Flavoparmelia caperata	Methanol	60	10	-7.80952
113	Flavoparmelia caperata	Methanol	60	10	-18.381
114	Flavoparmelia caperata	Methanol	60	10	-41.2381
115	Flavoparmelia caperata	Chloroform	60	10	-9.61423
116	Flavoparmelia caperata	Chloroform	60	10	7.9695
117	Flavoparmelia caperata	Chloroform	60	10	35.9599
118	Flavoparmelia caperata	Chloroform	60	10	29.4109
119	Flavoparmelia caperata	Chloroform	60	10	8.95634
120	Flavoparmelia caperata	Chloroform	60	10	9.76376
121	Flavoparmelia caperata	Water	60	10	-5.58573
122	Flavoparmelia caperata	Water	60	10	11.2296
123	Flavoparmelia caperata	Water	60	10	8.84407
124	Flavoparmelia caperata	Water	60	10	-8.20403
125	Flavoparmelia caperata	Water	60	10	28.685
126	Flavoparmelia caperata	Water	60	10	-6.63305
127	Flavoparmelia caperata	Methanol	60	50	-64.6786
128	Flavoparmelia caperata	Methanol	60	50	-68.25
129	Flavoparmelia caperata	Methanol	60	50	-50.6071
130	Flavoparmelia caperata	Methanol	60	50	-52.1786
131	Flavoparmelia caperata	Methanol	60	50	-58.75
132	Flavoparmelia caperata	Methanol	60	50	-57.8929
133	Flavoparmelia caperata	Chloroform	60	50	-79.994
134	Flavoparmelia caperata	Chloroform	60	50	-17.823
135	Flavoparmelia caperata	Chloroform	60	50	18.5108
136	Flavoparmelia caperata	Chloroform	60	50	-24.6411
137	Flavoparmelia caperata	Chloroform	60	50	23.8038
138	Flavoparmelia caperata	Chloroform	60	50	-32.9844
139	Flavoparmelia caperata	Water	60	50	-10.8126
140	Flavoparmelia caperata	Water	60	50	-6.56517
141	Flavoparmelia caperata	Water	60	50	2.04616
142	Flavoparmelia caperata	Water	60	50	-6.97246
143	Flavoparmelia caperata	Water	60	50	-10.6381
144	Flavoparmelia caperata	Water	60	50	-12.1509
145	Flavoparmelia caperata	Methanol	60	100	-37.0357
146	Flavoparmelia caperata	Methanol	60	100	-39.1786
147	Flavoparmelia caperata	Methanol	60	100	-49.9643
148	Flavoparmelia caperata	Methanol	60	100	-48.1071
149	Flavoparmelia caperata	Methanol	60	100	-50.9643
150	Flavoparmelia caperata	Methanol	60	100	-42.3929
151	Flavoparmelia caperata	Chloroform	60	100	-97.0843
152	Flavoparmelia caperata	Chloroform	60	100	-51.5999
153	Flavoparmelia caperata	Chloroform	60	100	-42.7183
154	Flavoparmelia caperata	Chloroform	60	100	-59.1358
155	Flavoparmelia caperata	Chloroform	60	100	-52.7661
156	Flavoparmelia caperata	Chloroform	60	100	-7.73026
157	Flavoparmelia caperata	Water	60	100	-10.5217
158	Flavoparmelia caperata	Water	60	100	-9.59077
159	Flavoparmelia caperata	Water	60	100	-9.88169
160	Flavoparmelia caperata	Water	60	100	11.8212
161	Flavoparmelia caperata	Water	60	100	9.78472
162	Flavoparmelia caperata	Water	60	100	16.476
163	Flavoparmelia caperata	Methanol	60	250	-20.3452
164	Flavoparmelia caperata	Methanol	60	250	-18.4881
165	Flavoparmelia caperata	Methanol	60	250	-24.631
166	Flavoparmelia caperata	Methanol	60	250	-21.131
167	Flavoparmelia caperata	Methanol	60	250	-33.7738
168	Flavoparmelia caperata	Methanol	60	250	-24.2738
169	Flavoparmelia caperata	Chloroform	60	250	-124.836
170	Flavoparmelia caperata	Chloroform	60	250	-45.9779
171	Flavoparmelia caperata	Chloroform	60	250	-9.10586
172	Flavoparmelia caperata	Chloroform	60	250	-95.2303
173	Flavoparmelia caperata	Chloroform	60	250	-57.6406
174	Flavoparmelia caperata	Chloroform	60	250	-119.094
175	Flavoparmelia caperata	Water	60	250	0.116369
176	Flavoparmelia caperata	Water	60	250	13.557
177	Flavoparmelia caperata	Water	60	250	10.706
178	Flavoparmelia caperata	Water	60	250	25.3685
179	Flavoparmelia caperata	Water	60	250	7.15671
180	Flavoparmelia caperata	Water	60	250	13.4407
181	Flavoparmelia caperata	Methanol	60	350	-14.7976
182	Flavoparmelia caperata	Methanol	60	350	-14.6548
183	Flavoparmelia caperata	Methanol	60	350	-17.7976
184	Flavoparmelia caperata	Methanol	60	350	-18.6548
185	Flavoparmelia caperata	Methanol	60	350	-21.0833
186	Flavoparmelia caperata	Methanol	60	350	-22.0833
187	Flavoparmelia caperata	Chloroform	60	350	-98.3254
188	Flavoparmelia caperata	Chloroform	60	350	-91.5969
189	Flavoparmelia caperata	Chloroform	60	350	-127.303
190	Flavoparmelia caperata	Chloroform	60	350	28.3493
191	Flavoparmelia caperata	Chloroform	60	350	-73.116
192	Flavoparmelia caperata	Chloroform	60	350	-81.1005
193	Flavoparmelia caperata	Water	60	350	8.37859
194	Flavoparmelia caperata	Water	60	350	7.85493
195	Flavoparmelia caperata	Water	60	350	34.2126
196	Flavoparmelia caperata	Water	60	350	35.5508
197	Flavoparmelia caperata	Water	60	350	26.1249
198	Flavoparmelia caperata	Water	60	350	25.5431
199	Flavoparmelia caperata	Methanol	60	500	6.2619
200	Flavoparmelia caperata	Methanol	60	500	5.61905
201	Flavoparmelia caperata	Methanol	60	500	3.90476
202	Flavoparmelia caperata	Methanol	60	500	4.69048
203	Flavoparmelia caperata	Methanol	60	500	-2.52381
204	Flavoparmelia caperata	Methanol	60	500	1.47619
205	Flavoparmelia caperata	Chloroform	60	500	-26.0915
206	Flavoparmelia caperata	Chloroform	60	500	-53.6334
207	Flavoparmelia caperata	Chloroform	60	500	64.3391
208	Flavoparmelia caperata	Chloroform	60	500	19.3929
209	Flavoparmelia caperata	Chloroform	60	500	-108.269
210	Flavoparmelia caperata	Chloroform	60	500	69.6322
211	Flavoparmelia caperata	Water	60	500	16.5341
212	Flavoparmelia caperata	Water	60	500	1.81342
213	Flavoparmelia caperata	Water	60	500	-3.13227
214	Flavoparmelia caperata	Water	60	500	-6.62335
215	Flavoparmelia caperata	Water	60	500	-7.2052
216	Flavoparmelia caperata	Water	60	500	18.8615
217	Letharia vulpina	Chloroform	60	10	20.7673
218	Letharia vulpina	Chloroform	60	10	19.9192
219	Letharia vulpina	Chloroform	60	10	21.9788
220	Letharia vulpina	Chloroform	60	10	13.7405
221	Letharia vulpina	Chloroform	60	10	-4.67441
222	Letharia vulpina	Chloroform	60	10	-31.8728
223	Letharia vulpina	Water	60	10	-39.3731
224	Letharia vulpina	Water	60	10	-96.2538
225	Letharia vulpina	Water	60	10	-40.1988
226	Letharia vulpina	Water	60	10	-52.3089
227	Letharia vulpina	Water	60	10	-36.5291
228	Letharia vulpina	Water	60	10	-95.6116
229	Letharia vulpina	Methanol	60	10	17.0666
230	Letharia vulpina	Methanol	60	10	16.661
231	Letharia vulpina	Methanol	60	10	13.0112
232	Letharia vulpina	Methanol	60	10	8.00946
233	Letharia vulpina	Methanol	60	10	6.59006
234	Letharia vulpina	Methanol	60	10	15.3092
235	Letharia vulpina	Chloroform	60	50	-6.29985
236	Letharia vulpina	Chloroform	60	50	-4.66431
237	Letharia vulpina	Chloroform	60	50	19.8082
238	Letharia vulpina	Chloroform	60	50	-1.87784
239	Letharia vulpina	Chloroform	60	50	-7.02675
240	Letharia vulpina	Chloroform	60	50	1.09036
241	Letharia vulpina	Water	60	50	-55.6728
242	Letharia vulpina	Water	60	50	7.263
243	Letharia vulpina	Water	60	50	-81.8196
244	Letharia vulpina	Water	60	50	-60.5352
245	Letharia vulpina	Water	60	50	-86.5902
246	Letharia vulpina	Water	60	50	-40.6269
247	Letharia vulpina	Methanol	60	50	49.8367
248	Letharia vulpina	Methanol	60	50	54.5004
249	Letharia vulpina	Methanol	60	50	53.5541
250	Letharia vulpina	Methanol	60	50	15.4331
251	Letharia vulpina	Methanol	60	50	19.7589
252	Letharia vulpina	Methanol	60	50	21.5839
253	Letharia vulpina	Chloroform	60	100	-5.04796
254	Letharia vulpina	Chloroform	60	100	3.19031
255	Letharia vulpina	Chloroform	60	100	22.3927
256	Letharia vulpina	Chloroform	60	100	-1.41343
257	Letharia vulpina	Chloroform	60	100	1.91822
258	Letharia vulpina	Chloroform	60	100	13.367
259	Letharia vulpina	Water	60	100	-114.648
260	Letharia vulpina	Water	60	100	-43.6391
261	Letharia vulpina	Water	60	100	-101.529
262	Letharia vulpina	Water	60	100	-50.0612
263	Letharia vulpina	Water	60	100	-119.786
264	Letharia vulpina	Water	60	100	-137.034
265	Letharia vulpina	Methanol	60	100	53.9146
266	Letharia vulpina	Methanol	60	100	55.0636
267	Letharia vulpina	Methanol	60	100	55.5368
268	Letharia vulpina	Methanol	60	100	57.3617
269	Letharia vulpina	Methanol	60	100	51.4138
270	Letharia vulpina	Methanol	60	100	53.5091
271	Letharia vulpina	Chloroform	60	250	5.79505
272	Letharia vulpina	Chloroform	60	250	-3.23069
273	Letharia vulpina	Chloroform	60	250	5.97678
274	Letharia vulpina	Chloroform	60	250	-3.47299
275	Letharia vulpina	Chloroform	60	250	-1.41343
276	Letharia vulpina	Chloroform	60	250	-7.71328
277	Letharia vulpina	Water	60	250	-117.187
278	Letharia vulpina	Water	60	250	-100.856
279	Letharia vulpina	Water	60	250	-61.315
280	Letharia vulpina	Water	60	250	-92.6911
281	Letharia vulpina	Water	60	250	-32.1407
282	Letharia vulpina	Water	60	250	-36.5443
283	Letharia vulpina	Methanol	60	250	85.0625
284	Letharia vulpina	Methanol	60	250	84.657
285	Letharia vulpina	Methanol	60	250	83.9811
286	Letharia vulpina	Methanol	60	250	82.021
287	Letharia vulpina	Methanol	60	250	81.5478
288	Letharia vulpina	Methanol	60	250	82.832
289	Letharia vulpina	Chloroform	60	350	-0.131247
290	Letharia vulpina	Chloroform	60	350	-0.918728
291	Letharia vulpina	Chloroform	60	350	-3.2206
292	Letharia vulpina	Chloroform	60	350	5.07824
293	Letharia vulpina	Chloroform	60	350	-6.49167
294	Letharia vulpina	Chloroform	60	350	-8.24836
295	Letharia vulpina	Water	60	350	-24.2966
296	Letharia vulpina	Water	60	350	-88.6086
297	Letharia vulpina	Water	60	350	-51.6361
298	Letharia vulpina	Water	60	350	-43.104
299	Letharia vulpina	Water	60	350	-21.8196
300	Letharia vulpina	Water	60	350	3.96024
301	Letharia vulpina	Methanol	60	350	88.8138
302	Letharia vulpina	Methanol	60	350	88.0703
303	Letharia vulpina	Methanol	60	350	88.2055
304	Letharia vulpina	Methanol	60	350	80.7705
305	Letharia vulpina	Methanol	60	350	80.4326
306	Letharia vulpina	Methanol	60	350	81.6492
307	Letharia vulpina	Chloroform	60	500	43.5639
308	Letharia vulpina	Chloroform	60	500	39.9899
309	Letharia vulpina	Chloroform	60	500	45.5628
310	Letharia vulpina	Chloroform	60	500	42.3523
311	Letharia vulpina	Chloroform	60	500	37.8092
312	Letharia vulpina	Chloroform	60	500	36.7794
313	Letharia vulpina	Water	60	500	-11.3303
314	Letharia vulpina	Water	60	500	-19.5872
315	Letharia vulpina	Water	60	500	-18.0275
316	Letharia vulpina	Water	60	500	20.4128
317	Letharia vulpina	Water	60	500	-13.7156
318	Letharia vulpina	Water	60	500	-26.3761
319	Letharia vulpina	Methanol	60	500	89.6136
320	Letharia vulpina	Methanol	60	500	90.9654
321	Letharia vulpina	Methanol	60	500	80.8944
322	Letharia vulpina	Methanol	60	500	92.0469
323	Letharia vulpina	Methanol	60	500	81.0296
324	Letharia vulpina	Methanol	60	500	82.9222
325	Parmotrema perlatum	Methanol	60	10	6.32515
326	Parmotrema perlatum	Methanol	60	10	18.7249
327	Parmotrema perlatum	Methanol	60	10	-4.19589
328	Parmotrema perlatum	Methanol	60	10	-12.1618
329	Parmotrema perlatum	Methanol	60	10	-6.67585
330	Parmotrema perlatum	Methanol	60	10	-25.6889
331	Parmotrema perlatum	Chloroform	60	10	8.76089
332	Parmotrema perlatum	Chloroform	60	10	12.7686
333	Parmotrema perlatum	Chloroform	60	10	11.5489
334	Parmotrema perlatum	Chloroform	60	10	43.9013
335	Parmotrema perlatum	Chloroform	60	10	7.07648
336	Parmotrema perlatum	Chloroform	60	10	21.1907
337	Parmotrema perlatum	Water	60	10	-21.9246
338	Parmotrema perlatum	Water	60	10	-36.9823
339	Parmotrema perlatum	Water	60	10	-13.749
340	Parmotrema perlatum	Water	60	10	-12.6405
341	Parmotrema perlatum	Water	60	10	-17.0747
342	Parmotrema perlatum	Water	60	10	-24.3726
343	Parmotrema perlatum	Methanol	60	50	23.2465
344	Parmotrema perlatum	Methanol	60	50	-8.09118
345	Parmotrema perlatum	Methanol	60	50	-18.9128
346	Parmotrema perlatum	Methanol	60	50	-13.1263
347	Parmotrema perlatum	Methanol	60	50	-21.2425
348	Parmotrema perlatum	Methanol	60	50	-15.9068
349	Parmotrema perlatum	Chloroform	60	50	9.26428
350	Parmotrema perlatum	Chloroform	60	50	9.96128
351	Parmotrema perlatum	Chloroform	60	50	26.515
352	Parmotrema perlatum	Chloroform	60	50	10.7164
353	Parmotrema perlatum	Chloroform	60	50	4.73379
354	Parmotrema perlatum	Chloroform	60	50	22.9138
355	Parmotrema perlatum	Water	60	50	-0.769823
356	Parmotrema perlatum	Water	60	50	15.0731
357	Parmotrema perlatum	Water	60	50	23.8029
358	Parmotrema perlatum	Water	60	50	46.3895
359	Parmotrema perlatum	Water	60	50	28.2371
360	Parmotrema perlatum	Water	60	50	25.0038
361	Parmotrema perlatum	Methanol	60	100	9.21844
362	Parmotrema perlatum	Methanol	60	100	-0.0250501
363	Parmotrema perlatum	Methanol	60	100	-14.0782
364	Parmotrema perlatum	Methanol	60	100	1.17735
365	Parmotrema perlatum	Methanol	60	100	-23.1713
366	Parmotrema perlatum	Methanol	60	100	-15.6563
367	Parmotrema perlatum	Chloroform	60	100	14.5111
368	Parmotrema perlatum	Chloroform	60	100	18.8093
369	Parmotrema perlatum	Chloroform	60	100	28.8577
370	Parmotrema perlatum	Chloroform	60	100	37.8606
371	Parmotrema perlatum	Chloroform	60	100	21.0165
372	Parmotrema perlatum	Chloroform	60	100	7.83156
373	Parmotrema perlatum	Water	60	100	28.3526
374	Parmotrema perlatum	Water	60	100	15.7891
375	Parmotrema perlatum	Water	60	100	37.0824
376	Parmotrema perlatum	Water	60	100	38.699
377	Parmotrema perlatum	Water	60	100	38.0523
378	Parmotrema perlatum	Water	60	100	49.9692
379	Parmotrema perlatum	Methanol	60	250	8.29158
380	Parmotrema perlatum	Methanol	60	250	6.78858
381	Parmotrema perlatum	Methanol	60	250	1.002
382	Parmotrema perlatum	Methanol	60	250	-12.3747
383	Parmotrema perlatum	Methanol	60	250	-1.85371
384	Parmotrema perlatum	Methanol	60	250	0.325651
385	Parmotrema perlatum	Chloroform	60	250	10.3388
386	Parmotrema perlatum	Chloroform	60	250	16.728
387	Parmotrema perlatum	Chloroform	60	250	12.9526
388	Parmotrema perlatum	Chloroform	60	250	25.0339
389	Parmotrema perlatum	Chloroform	60	250	16.9022
390	Parmotrema perlatum	Chloroform	60	250	20.7357
391	Parmotrema perlatum	Water	60	250	40.4234
392	Parmotrema perlatum	Water	60	250	43.241
393	Parmotrema perlatum	Water	60	250	45.1809
394	Parmotrema perlatum	Water	60	250	56.1278
395	Parmotrema perlatum	Water	60	250	41.301
396	Parmotrema perlatum	Water	60	250	63.8414
397	Parmotrema perlatum	Methanol	60	350	20.0025
398	Parmotrema perlatum	Methanol	60	350	14.3662
399	Parmotrema perlatum	Methanol	60	350	14.4414
400	Parmotrema perlatum	Methanol	60	350	8.05361
401	Parmotrema perlatum	Methanol	60	350	8.95541
402	Parmotrema perlatum	Methanol	60	350	-12.4624
403	Parmotrema perlatum	Chloroform	60	350	14.9758
404	Parmotrema perlatum	Chloroform	60	350	19.2159
405	Parmotrema perlatum	Chloroform	60	350	26.3601
406	Parmotrema perlatum	Chloroform	60	350	34.666
407	Parmotrema perlatum	Chloroform	60	350	18.635
408	Parmotrema perlatum	Chloroform	60	350	8.76089
409	Parmotrema perlatum	Water	60	350	41.0931
410	Parmotrema perlatum	Water	60	350	45.0654
411	Parmotrema perlatum	Water	60	350	59.7537
412	Parmotrema perlatum	Water	60	350	-25.281
413	Parmotrema perlatum	Water	60	350	2.29407
414	Parmotrema perlatum	Water	60	350	-12.9022
415	Parmotrema perlatum	Methanol	60	500	23.5847
416	Parmotrema perlatum	Methanol	60	500	18.4744
417	Parmotrema perlatum	Methanol	60	500	20.5035
418	Parmotrema perlatum	Methanol	60	500	16.2951
419	Parmotrema perlatum	Methanol	60	500	1.34018
420	Parmotrema perlatum	Methanol	60	500	10.3582
421	Parmotrema perlatum	Chloroform	60	500	-92.2652
422	Parmotrema perlatum	Chloroform	60	500	52.8267
423	Parmotrema perlatum	Chloroform	60	500	-44.7531
424	Parmotrema perlatum	Chloroform	60	500	80.1258
425	Parmotrema perlatum	Chloroform	60	500	6.01162
426	Parmotrema perlatum	Chloroform	60	500	19.4288
427	Parmotrema perlatum	Water	60	500	-18.5373
428	Parmotrema perlatum	Water	60	500	-8.28329
429	Parmotrema perlatum	Water	60	500	-3.71055
430	Parmotrema perlatum	Water	60	500	13.6105
431	Parmotrema perlatum	Water	60	500	-5.09623
432	Parmotrema perlatum	Water	60	500	20.3079
433	Flavoparmelia caperata	Chloroform/Methanol	60	10	-12.4841
434	Flavoparmelia caperata	Chloroform/Methanol	60	10	11.0828
435	Flavoparmelia caperata	Chloroform/Methanol	60	10	-34.3949
436	Flavoparmelia caperata	Chloroform/Methanol	60	10	4.90446
437	Flavoparmelia caperata	Chloroform/Methanol	60	10	5.79618
438	Flavoparmelia caperata	Chloroform/Methanol	60	10	13.1847
439	Flavoparmelia caperata	Chloroform/Methanol	60	50	7.99363
440	Flavoparmelia caperata	Chloroform/Methanol	60	50	27.9936
441	Flavoparmelia caperata	Chloroform/Methanol	60	50	32.1338
442	Flavoparmelia caperata	Chloroform/Methanol	60	50	-4.80892
443	Flavoparmelia caperata	Chloroform/Methanol	60	50	33.9809
444	Flavoparmelia caperata	Chloroform/Methanol	60	50	5.25478
445	Flavoparmelia caperata	Chloroform/Methanol	60	100	16.189
446	Flavoparmelia caperata	Chloroform/Methanol	60	100	52.3036
447	Flavoparmelia caperata	Chloroform/Methanol	60	100	20.2017
448	Flavoparmelia caperata	Chloroform/Methanol	60	100	35.4883
449	Flavoparmelia caperata	Chloroform/Methanol	60	100	37.2718
450	Flavoparmelia caperata	Chloroform/Methanol	60	100	40.6476
451	Flavoparmelia caperata	Chloroform/Methanol	60	250	58.4183
452	Flavoparmelia caperata	Chloroform/Methanol	60	250	43.1953
453	Flavoparmelia caperata	Chloroform/Methanol	60	250	55.4883
454	Flavoparmelia caperata	Chloroform/Methanol	60	250	35.552
455	Flavoparmelia caperata	Chloroform/Methanol	60	250	44.0234
456	Flavoparmelia caperata	Chloroform/Methanol	60	250	52.1125
457	Flavoparmelia caperata	Chloroform/Methanol	60	350	38.7367
458	Flavoparmelia caperata	Chloroform/Methanol	60	350	20.3928
459	Flavoparmelia caperata	Chloroform/Methanol	60	350	24.9151
460	Flavoparmelia caperata	Chloroform/Methanol	60	350	-5.27601
461	Flavoparmelia caperata	Chloroform/Methanol	60	350	-4.44798
462	Flavoparmelia caperata	Chloroform/Methanol	60	350	-25.6582
463	Flavoparmelia caperata	Chloroform/Methanol	60	500	-16.9958
464	Flavoparmelia caperata	Chloroform/Methanol	60	500	-14.1932
465	Flavoparmelia caperata	Chloroform/Methanol	60	500	-9.98938
466	Flavoparmelia caperata	Chloroform/Methanol	60	500	11.7304
467	Flavoparmelia caperata	Chloroform/Methanol	60	500	-13.3652
468	Flavoparmelia caperata	Chloroform/Methanol	60	500	40.0743
469	Letharia vulpina	Chloroform/Methanol	60	10	3.35738
470	Letharia vulpina	Chloroform/Methanol	60	10	34.4754
471	Letharia vulpina	Chloroform/Methanol	60	10	-7.30723
472	Letharia vulpina	Chloroform/Methanol	60	10	8.97304
473	Letharia vulpina	Chloroform/Methanol	60	10	4.90297
474	Letharia vulpina	Chloroform/Methanol	60	10	32.6206
475	Letharia vulpina	Chloroform/Methanol	60	50	45.0283
476	Letharia vulpina	Chloroform/Methanol	60	50	43.4312
477	Letharia vulpina	Chloroform/Methanol	60	50	36.9397
478	Letharia vulpina	Chloroform/Methanol	60	50	34.0546
479	Letharia vulpina	Chloroform/Methanol	60	50	35.085
480	Letharia vulpina	Chloroform/Methanol	60	50	38.3308
481	Letharia vulpina	Chloroform/Methanol	60	100	32.7323
482	Letharia vulpina	Chloroform/Methanol	60	100	38.554
483	Letharia vulpina	Chloroform/Methanol	60	100	34.6385
484	Letharia vulpina	Chloroform/Methanol	60	100	55.8647
485	Letharia vulpina	Chloroform/Methanol	60	100	42.2634
486	Letharia vulpina	Chloroform/Methanol	60	100	30.5169
487	Letharia vulpina	Chloroform/Methanol	60	250	38.7172
488	Letharia vulpina	Chloroform/Methanol	60	250	39.3869
489	Letharia vulpina	Chloroform/Methanol	60	250	38.9232
490	Letharia vulpina	Chloroform/Methanol	60	250	64.9923
491	Letharia vulpina	Chloroform/Methanol	60	250	52.1638
492	Letharia vulpina	Chloroform/Methanol	60	250	46.5482
493	Letharia vulpina	Chloroform/Methanol	60	350	56.6804
494	Letharia vulpina	Chloroform/Methanol	60	350	47.716
495	Letharia vulpina	Chloroform/Methanol	60	350	45.2945
496	Letharia vulpina	Chloroform/Methanol	60	350	24.9442
497	Letharia vulpina	Chloroform/Methanol	60	350	27.9839
498	Letharia vulpina	Chloroform/Methanol	60	350	42.8216
499	Letharia vulpina	Chloroform/Methanol	60	500	40.6234
500	Letharia vulpina	Chloroform/Methanol	60	500	26.3524
501	Letharia vulpina	Chloroform/Methanol	60	500	28.6193
502	Letharia vulpina	Chloroform/Methanol	60	500	50.9274
503	Letharia vulpina	Chloroform/Methanol	60	500	39.9021
504	Letharia vulpina	Chloroform/Methanol	60	500	57.3158
505	Cetraria islandica	Chloroform/Methanol	60	10	-24.1333
506	Cetraria islandica	Chloroform/Methanol	60	10	1.60784
507	Cetraria islandica	Chloroform/Methanol	60	10	19.5373
508	Cetraria islandica	Chloroform/Methanol	60	10	-28.2275
509	Cetraria islandica	Chloroform/Methanol	60	10	-28.651
510	Cetraria islandica	Chloroform/Methanol	60	10	-18.251
511	Cetraria islandica	Chloroform/Methanol	60	50	-1.15294
512	Cetraria islandica	Chloroform/Methanol	60	50	5.24706
513	Cetraria islandica	Chloroform/Methanol	60	50	9.52941
514	Cetraria islandica	Chloroform/Methanol	60	50	12.5882
515	Cetraria islandica	Chloroform/Methanol	60	50	23.6471
516	Cetraria islandica	Chloroform/Methanol	60	50	8.54118
517	Cetraria islandica	Chloroform/Methanol	60	100	27.4588
518	Cetraria islandica	Chloroform/Methanol	60	100	37.9529
519	Cetraria islandica	Chloroform/Methanol	60	100	35.0824
520	Cetraria islandica	Chloroform/Methanol	60	100	46.8941
521	Cetraria islandica	Chloroform/Methanol	60	100	42.0471
522	Cetraria islandica	Chloroform/Methanol	60	100	46.1412
523	Cetraria islandica	Chloroform/Methanol	60	250	57.1451
524	Cetraria islandica	Chloroform/Methanol	60	250	68.1569
525	Cetraria islandica	Chloroform/Methanol	60	250	62.4157
526	Cetraria islandica	Chloroform/Methanol	60	250	60.1569
527	Cetraria islandica	Chloroform/Methanol	60	250	71.2157
528	Cetraria islandica	Chloroform/Methanol	60	250	62.2275
529	Cetraria islandica	Chloroform/Methanol	60	350	67.2471
530	Cetraria islandica	Chloroform/Methanol	60	350	68
531	Cetraria islandica	Chloroform/Methanol	60	350	69.6
532	Cetraria islandica	Chloroform/Methanol	60	350	68.7529
533	Cetraria islandica	Chloroform/Methanol	60	350	66.6353
534	Cetraria islandica	Chloroform/Methanol	60	350	71.1059
535	Cetraria islandica	Chloroform/Methanol	60	500	45.0039
536	Cetraria islandica	Chloroform/Methanol	60	500	68.5333
537	Cetraria islandica	Chloroform/Methanol	60	500	54.7451
538	Cetraria islandica	Chloroform/Methanol	60	500	57.898
539	Cetraria islandica	Chloroform/Methanol	60	500	54.0392
540	Cetraria islandica	Chloroform/Methanol	60	500	61.051
541	Parmotrema perlatum	Chloroform/Methanol	60	10	-17.1331
542	Parmotrema perlatum	Chloroform/Methanol	60	10	11.3372
543	Parmotrema perlatum	Chloroform/Methanol	60	10	8.8154
544	Parmotrema perlatum	Chloroform/Methanol	60	10	-3.52837
545	Parmotrema perlatum	Chloroform/Methanol	60	10	-13.1512
546	Parmotrema perlatum	Chloroform/Methanol	60	10	4.50171
547	Parmotrema perlatum	Chloroform/Methanol	60	50	-14.6776
548	Parmotrema perlatum	Chloroform/Methanol	60	50	-9.70025
549	Parmotrema perlatum	Chloroform/Methanol	60	50	-1.53744
550	Parmotrema perlatum	Chloroform/Methanol	60	50	17.0446
551	Parmotrema perlatum	Chloroform/Methanol	60	50	14.1245
552	Parmotrema perlatum	Chloroform/Methanol	60	50	-7.17841
553	Parmotrema perlatum	Chloroform/Methanol	60	100	-14.2794
554	Parmotrema perlatum	Chloroform/Methanol	60	100	-7.97478
555	Parmotrema perlatum	Chloroform/Methanol	60	100	11.7354
556	Parmotrema perlatum	Chloroform/Methanol	60	100	-0.0774251
557	Parmotrema perlatum	Chloroform/Methanol	60	100	29.2556
558	Parmotrema perlatum	Chloroform/Methanol	60	100	16.3146
559	Parmotrema perlatum	Chloroform/Methanol	60	250	1.83608
560	Parmotrema perlatum	Chloroform/Methanol	60	250	3.82701
561	Parmotrema perlatum	Chloroform/Methanol	60	250	37.2083
562	Parmotrema perlatum	Chloroform/Methanol	60	250	17.6972
563	Parmotrema perlatum	Chloroform/Methanol	60	250	-4.20307
564	Parmotrema perlatum	Chloroform/Methanol	60	250	7.47705
565	Parmotrema perlatum	Chloroform/Methanol	60	350	9.02555
566	Parmotrema perlatum	Chloroform/Methanol	60	350	14.6002
567	Parmotrema perlatum	Chloroform/Methanol	60	350	19.0466
568	Parmotrema perlatum	Chloroform/Methanol	60	350	27.0767
569	Parmotrema perlatum	Chloroform/Methanol	60	350	13.1401
570	Parmotrema perlatum	Chloroform/Methanol	60	350	14.6002
571	Parmotrema perlatum	Chloroform/Methanol	60	500	19.5775
572	Parmotrema perlatum	Chloroform/Methanol	60	500	18.7147
573	Parmotrema perlatum	Chloroform/Methanol	60	500	17.852
574	Parmotrema perlatum	Chloroform/Methanol	60	500	40.4822
575	Parmotrema perlatum	Chloroform/Methanol	60	500	22.4975
576	Parmotrema perlatum	Chloroform/Methanol	60	500	26.0812
